# Supplementary material for: Orbital contributions to the magnetic shielding of cyclo[2n]carbons (n = 3–12)
Source: Royal Society of Chemistry journal article supplement (doi:10.1039/d5cp00032g), 2025-01-01
Supplement: d5cp00032g1.pdf [file d5cp00032g1.pdf]

**Orbital Contributions to the Magnetic Shielding of  
Cyclo[2n]carbons ( $n = 3 - 12$ )**

Marija Baranac-Stojanović\*

*University of Belgrade - Faculty of Chemistry, Studentski trg 12-16, P.O.Box 158, 11000 Belgrade,  
Serbia*

***Supplementary Information***

Absolute energies and x, y, z coordinates of optimized structures.....S2

## Absolute energies and x, y, z coordinates of optimized structures

### Cyclo[6]carbon

E = -228.2353012 a.u.

| Center<br>Number | Atomic<br>Number | Atomic<br>Type | Coordinates (Angstroms) |           |          |
|------------------|------------------|----------------|-------------------------|-----------|----------|
|                  |                  |                | X                       | Y         | Z        |
| 1                | 6                | 0              | 0.000000                | 1.080376  | 0.000000 |
| 2                | 6                | 0              | 1.271856                | 0.734306  | 0.000000 |
| 3                | 6                | 0              | 0.935633                | -0.540188 | 0.000000 |
| 4                | 6                | 0              | 0.000000                | -1.468612 | 0.000000 |
| 5                | 6                | 0              | -0.935633               | -0.540188 | 0.000000 |
| 6                | 6                | 0              | -1.271856               | 0.734306  | 0.000000 |

### Cyclo[8]carbon

E = -304.3731121 a.u.

| Center<br>Number | Atomic<br>Number | Atomic<br>Type | Coordinates (Angstroms) |           |          |
|------------------|------------------|----------------|-------------------------|-----------|----------|
|                  |                  |                | X                       | Y         | Z        |
| 1                | 6                | 0              | 0.664473                | 1.715966  | 0.000000 |
| 2                | 6                | 0              | -0.664473               | 1.338567  | 0.000000 |
| 3                | 6                | 0              | -1.715966               | 0.664473  | 0.000000 |
| 4                | 6                | 0              | -1.338567               | -0.664473 | 0.000000 |
| 5                | 6                | 0              | -0.664473               | -1.715966 | 0.000000 |
| 6                | 6                | 0              | 0.664473                | -1.338567 | 0.000000 |
| 7                | 6                | 0              | 1.715966                | -0.664473 | 0.000000 |
| 8                | 6                | 0              | 1.338567                | 0.664473  | 0.000000 |

### Cyclo[10]carbon

E = -380.6228357 a.u.

| Center<br>Number | Atomic<br>Number | Atomic<br>Type | Coordinates (Angstroms) |           |          |
|------------------|------------------|----------------|-------------------------|-----------|----------|
|                  |                  |                | X                       | Y         | Z        |
| 1                | 6                | 0              | 0.000000                | 1.923867  | 0.000000 |
| 2                | 6                | 0              | 1.277008                | 1.757651  | 0.000000 |
| 3                | 6                | 0              | 1.829707                | 0.594508  | 0.000000 |
| 4                | 6                | 0              | 2.066243                | -0.671363 | 0.000000 |
| 5                | 6                | 0              | 1.130821                | -1.556441 | 0.000000 |
| 6                | 6                | 0              | 0.000000                | -2.172576 | 0.000000 |
| 7                | 6                | 0              | -1.130821               | -1.556441 | 0.000000 |
| 8                | 6                | 0              | -2.066243               | -0.671363 | 0.000000 |
| 9                | 6                | 0              | -1.829707               | 0.594508  | 0.000000 |
| 10               | 6                | 0              | -1.277008               | 1.757651  | 0.000000 |

### Cyclo[12]carbon

E = -456.7388599 a.u.

| Center<br>Number | Atomic<br>Number | Atomic<br>Type | Coordinates (Angstroms) |           |          |
|------------------|------------------|----------------|-------------------------|-----------|----------|
|                  |                  |                | X                       | Y         | Z        |
| 1                | 6                | 0              | 0.000000                | 2.361362  | 0.000000 |
| 2                | 6                | 0              | -1.227779               | 2.264466  | 0.000000 |
| 3                | 6                | 0              | -2.044999               | 1.180681  | 0.000000 |
| 4                | 6                | 0              | -2.574974               | 0.068945  | 0.000000 |
| 5                | 6                | 0              | -2.044999               | -1.180681 | 0.000000 |
| 6                | 6                | 0              | -1.347195               | -2.195521 | 0.000000 |
| 7                | 6                | 0              | 0.000000                | -2.361362 | 0.000000 |
| 8                | 6                | 0              | 1.227779                | -2.264466 | 0.000000 |
| 9                | 6                | 0              | 2.044999                | -1.180681 | 0.000000 |
| 10               | 6                | 0              | 2.574974                | -0.068945 | 0.000000 |
| 11               | 6                | 0              | 2.044999                | 1.180681  | 0.000000 |
| 12               | 6                | 0              | 1.347195                | 2.195521  | 0.000000 |

### Cyclo[14]carbon

E = -532.9374548 a.u.

| Center<br>Number | Atomic<br>Number | Atomic<br>Type | Coordinates (Angstroms) |           |          |
|------------------|------------------|----------------|-------------------------|-----------|----------|
|                  |                  |                | X                       | Y         | Z        |
| 1                | 6                | 0              | -0.618958               | 2.711831  | 0.000000 |
| 2                | 6                | 0              | -1.808584               | 2.307097  | 0.000000 |
| 3                | 6                | 0              | -2.506109               | 1.206878  | 0.000000 |
| 4                | 6                | 0              | -2.931395               | 0.024444  | 0.000000 |
| 5                | 6                | 0              | -2.506109               | -1.206878 | 0.000000 |
| 6                | 6                | 0              | -1.846806               | -2.276616 | 0.000000 |
| 7                | 6                | 0              | -0.618958               | -2.711831 | 0.000000 |
| 8                | 6                | 0              | 0.628466                | -2.863338 | 0.000000 |
| 9                | 6                | 0              | 1.734281                | -2.174720 | 0.000000 |
| 10               | 6                | 0              | 2.630490                | -1.293908 | 0.000000 |
| 11               | 6                | 0              | 2.781571                | 0.000000  | 0.000000 |
| 12               | 6                | 0              | 2.651701                | 1.249862  | 0.000000 |
| 13               | 6                | 0              | 1.734281                | 2.174720  | 0.000000 |
| 14               | 6                | 0              | 0.676128                | 2.852460  | 0.000000 |

### Cyclo[16]carbon

E = -609.0779286 a.u.

| Center<br>Number | Atomic<br>Number | Atomic<br>Type | Coordinates (Angstroms) |           |          |
|------------------|------------------|----------------|-------------------------|-----------|----------|
|                  |                  |                | X                       | Y         | Z        |
| 1                | 6                | 0              | -0.076528               | 3.300549  | 0.000000 |
| 2                | 6                | 0              | -1.263117               | 3.049435  | 0.000000 |
| 3                | 6                | 0              | -2.387954               | 2.279727  | 0.000000 |
| 4                | 6                | 0              | -3.049435               | 1.263117  | 0.000000 |
| 5                | 6                | 0              | -3.300549               | -0.076528 | 0.000000 |
| 6                | 6                | 0              | -3.049435               | -1.263117 | 0.000000 |
| 7                | 6                | 0              | -2.279727               | -2.387954 | 0.000000 |
| 8                | 6                | 0              | -1.263117               | -3.049435 | 0.000000 |
| 9                | 6                | 0              | 0.076528                | -3.300549 | 0.000000 |
| 10               | 6                | 0              | 1.263117                | -3.049435 | 0.000000 |
| 11               | 6                | 0              | 2.387954                | -2.279727 | 0.000000 |
| 12               | 6                | 0              | 3.049435                | -1.263117 | 0.000000 |
| 13               | 6                | 0              | 3.300549                | 0.076528  | 0.000000 |
| 14               | 6                | 0              | 3.049435                | 1.263117  | 0.000000 |
| 15               | 6                | 0              | 2.279727                | 2.387954  | 0.000000 |
| 16               | 6                | 0              | 1.263117                | 3.049435  | 0.000000 |

### Cyclo[18]carbon

E = -685.2534457 a.u.

| Center<br>Number | Atomic<br>Number | Atomic<br>Type | Coordinates (Angstroms) |           |          |
|------------------|------------------|----------------|-------------------------|-----------|----------|
|                  |                  |                | X                       | Y         | Z        |
| 1                | 6                | 0              | 0.610165                | 3.642263  | 0.000000 |
| 2                | 6                | 0              | -0.610165               | 3.642263  | 0.000000 |
| 3                | 6                | 0              | -1.873788               | 3.182342  | 0.000000 |
| 4                | 6                | 0              | -2.808615               | 2.397929  | 0.000000 |
| 5                | 6                | 0              | -3.480975               | 1.233367  | 0.000000 |
| 6                | 6                | 0              | -3.692883               | 0.031578  | 0.000000 |
| 7                | 6                | 0              | -3.459375               | -1.292714 | 0.000000 |
| 8                | 6                | 0              | -2.849210               | -2.349550 | 0.000000 |
| 9                | 6                | 0              | -1.819095               | -3.213919 | 0.000000 |
| 10               | 6                | 0              | -0.672360               | -3.631296 | 0.000000 |
| 11               | 6                | 0              | 0.672360                | -3.631296 | 0.000000 |
| 12               | 6                | 0              | 1.819095                | -3.213919 | 0.000000 |
| 13               | 6                | 0              | 2.849210                | -2.349550 | 0.000000 |
| 14               | 6                | 0              | 3.459375                | -1.292714 | 0.000000 |
| 15               | 6                | 0              | 3.692883                | 0.031578  | 0.000000 |
| 16               | 6                | 0              | 3.480975                | 1.233367  | 0.000000 |
| 17               | 6                | 0              | 2.808615                | 2.397929  | 0.000000 |
| 18               | 6                | 0              | 1.873788                | 3.182342  | 0.000000 |

### Cyclo[20]carbon

E = -761.4040775 a.u.

| Center Number | Atomic Number | Atomic Type | Coordinates (Angstroms) |           |          |
|---------------|---------------|-------------|-------------------------|-----------|----------|
|               |               |             | X                       | Y         | Z        |
| 1             | 6             | 0           | 0.606797                | 4.063428  | 0.000000 |
| 2             | 6             | 0           | -0.606797               | 4.063428  | 0.000000 |
| 3             | 6             | 0           | -1.897514               | 3.644048  | 0.000000 |
| 4             | 6             | 0           | -2.879332               | 2.930716  | 0.000000 |
| 5             | 6             | 0           | -3.677039               | 1.832766  | 0.000000 |
| 6             | 6             | 0           | -4.052060               | 0.678570  | 0.000000 |
| 7             | 6             | 0           | -4.052060               | -0.678570 | 0.000000 |
| 8             | 6             | 0           | -3.677039               | -1.832766 | 0.000000 |
| 9             | 6             | 0           | -2.879332               | -2.930716 | 0.000000 |
| 10            | 6             | 0           | -1.897514               | -3.644048 | 0.000000 |
| 11            | 6             | 0           | -0.606797               | -4.063428 | 0.000000 |
| 12            | 6             | 0           | 0.606797                | -4.063428 | 0.000000 |
| 13            | 6             | 0           | 1.897514                | -3.644048 | 0.000000 |
| 14            | 6             | 0           | 2.879332                | -2.930716 | 0.000000 |
| 15            | 6             | 0           | 3.677039                | -1.832766 | 0.000000 |
| 16            | 6             | 0           | 4.052060                | -0.678570 | 0.000000 |
| 17            | 6             | 0           | 4.052060                | 0.678570  | 0.000000 |
| 18            | 6             | 0           | 3.677039                | 1.832766  | 0.000000 |
| 19            | 6             | 0           | 2.879332                | 2.930716  | 0.000000 |
| 20            | 6             | 0           | 1.897514                | 3.644048  | 0.000000 |

### Cyclo[22]carbon

E = -837.5675672 a.u.

| Center Number | Atomic Number | Atomic Type | Coordinates (Angstroms) |           |          |
|---------------|---------------|-------------|-------------------------|-----------|----------|
|               |               |             | X                       | Y         | Z        |
| 1             | 6             | 0           | -0.608247               | 4.466506  | 0.000000 |
| 2             | 6             | 0           | 0.608247                | 4.466506  | 0.000000 |
| 3             | 6             | 0           | 1.903085                | 4.086307  | 0.000000 |
| 4             | 6             | 0           | 2.926466                | 3.428621  | 0.000000 |
| 5             | 6             | 0           | 3.810202                | 2.408735  | 0.000000 |
| 6             | 6             | 0           | 4.315552                | 1.302173  | 0.000000 |
| 7             | 6             | 0           | 4.507606                | -0.033594 | 0.000000 |
| 8             | 6             | 0           | 4.334481                | -1.237706 | 0.000000 |
| 9             | 6             | 0           | 3.773877                | -2.465257 | 0.000000 |
| 10            | 6             | 0           | 2.977243                | -3.384622 | 0.000000 |
| 11            | 6             | 0           | 1.841969                | -4.114218 | 0.000000 |
| 12            | 6             | 0           | 0.674751                | -4.456944 | 0.000000 |
| 13            | 6             | 0           | -0.674751               | -4.456944 | 0.000000 |
| 14            | 6             | 0           | -1.841969               | -4.114218 | 0.000000 |
| 15            | 6             | 0           | -2.977243               | -3.384622 | 0.000000 |
| 16            | 6             | 0           | -3.773877               | -2.465257 | 0.000000 |
| 17            | 6             | 0           | -4.334481               | -1.237706 | 0.000000 |
| 18            | 6             | 0           | -4.507606               | -0.033594 | 0.000000 |
| 19            | 6             | 0           | -4.315552               | 1.302173  | 0.000000 |

|    |   |   |           |          |          |
|----|---|---|-----------|----------|----------|
| 20 | 6 | 0 | -3.810202 | 2.408735 | 0.000000 |
| 21 | 6 | 0 | -2.926466 | 3.428621 | 0.000000 |
| 22 | 6 | 0 | -1.903085 | 4.086307 | 0.000000 |

---

### Cyclo[24]carbon

E = -913.7206029 a.u.

---

| Center<br>Number | Atomic<br>Number | Atomic<br>Type | Coordinates (Angstroms) |           |          |
|------------------|------------------|----------------|-------------------------|-----------|----------|
|                  |                  |                | X                       | Y         | Z        |
| 1                | 6                | 0              | -0.606859               | 4.881282  | 0.000000 |
| 2                | 6                | 0              | 0.606859                | 4.881282  | 0.000000 |
| 3                | 6                | 0              | 1.915086                | 4.530743  | 0.000000 |
| 4                | 6                | 0              | 2.966196                | 3.923885  | 0.000000 |
| 5                | 6                | 0              | 3.923885                | 2.966196  | 0.000000 |
| 6                | 6                | 0              | 4.530743                | 1.915086  | 0.000000 |
| 7                | 6                | 0              | 4.881282                | 0.606859  | 0.000000 |
| 8                | 6                | 0              | 4.881282                | -0.606859 | 0.000000 |
| 9                | 6                | 0              | 4.530743                | -1.915086 | 0.000000 |
| 10               | 6                | 0              | 3.923885                | -2.966196 | 0.000000 |
| 11               | 6                | 0              | 2.966196                | -3.923885 | 0.000000 |
| 12               | 6                | 0              | 1.915086                | -4.530743 | 0.000000 |
| 13               | 6                | 0              | 0.606859                | -4.881282 | 0.000000 |
| 14               | 6                | 0              | -0.606859               | -4.881282 | 0.000000 |
| 15               | 6                | 0              | -1.915086               | -4.530743 | 0.000000 |
| 16               | 6                | 0              | -2.966196               | -3.923885 | 0.000000 |
| 17               | 6                | 0              | -3.923885               | -2.966196 | 0.000000 |
| 18               | 6                | 0              | -4.530743               | -1.915086 | 0.000000 |
| 19               | 6                | 0              | -4.881282               | -0.606859 | 0.000000 |
| 20               | 6                | 0              | -4.881282               | 0.606859  | 0.000000 |
| 21               | 6                | 0              | -4.530743               | 1.915086  | 0.000000 |
| 22               | 6                | 0              | -3.923885               | 2.966196  | 0.000000 |
| 23               | 6                | 0              | -2.966196               | 3.923885  | 0.000000 |
| 24               | 6                | 0              | -1.915086               | 4.530743  | 0.000000 |

---
